# Supplementary material for: How long do revised and multiply revised hip replacements last? A retrospective observational study of the National Joint Registry
Source: PubMed Central journal article supplement (PMC9647039; doi:10.1016/s2665-9913(22)00097-2), 2022-06-23

# THE LANCET

## Rheumatology

### Supplementary appendix

This appendix formed part of the original submission and has been peer reviewed.  
We post it as supplied by the authors.

Supplement to: Deere K, Whitehouse MR, Kunutsor SK, Sayers A, Mason J, Blom AW.  
How long do revised and multiply revised hip replacements last? A retrospective  
observational study of the National Joint Registry. *Lancet Rheumatol* 2022; **4**: e468–79.

**Supplemental table 1: Kaplan-Meier estimates of cumulative 2nd revision in both study populations, stratified by age, and age and sex combined**

| Age group (years) | Hip type    | N (%)         | Time since first revision |                     |                     |                     |                     |                     |                     |
|-------------------|-------------|---------------|---------------------------|---------------------|---------------------|---------------------|---------------------|---------------------|---------------------|
|                   |             |               | 1 year                    | 3 years             | 5 years             | 7 years             | 10 years            | 13 years            | 15 years            |
| All cases         | Total hips  | 2,712 (100%)  | 9.32 (8.25-10.51)         | 15.99 (14.54-17.58) | 19.91 (18.19-21.78) | 22.28 (20.30-24.42) | 25.85 (23.01-28.97) | 26.90 (23.52-30.66) | ..                  |
|                   | Resurfacing | 457 (100%)    | 6.97 (4.96-9.77)          | 14.11 (11.10-17.86) | 17.54 (14.09-21.70) | 20.97 (16.94-25.80) | 22.13 (17.67-27.51) | ..                  | ..                  |
| Females           | Total hips  | 1,497 (55.2%) | 9.38 (7.97-11.02)         | 16.45 (14.49-18.64) | 19.48 (17.24-21.96) | 21.46 (18.96-24.24) | 22.46 (19.64-25.61) | 24.07 (20.10-28.68) | 40.21 (23.38-62.95) |
|                   | Resurfacing | 227 (49.7%)   | 6.35 (3.81-10.49)         | 15.28 (11.04-20.94) | 19.49 (14.58-25.79) | 22.28 (16.76-29.26) | 24.63 (18.00-33.17) | ..                  | ..                  |
| Female (<55)      | Total hips  | 117 (4.3%)    | 10.60 (6.16-17.91)        | 23.79 (16.50-33.58) | 27.25 (19.13-37.92) | 27.25 (19.13-37.92) | 33.87 (21.25-51.12) | 33.87 (21.25-51.12) | 66.93 (26.74-98.05) |
|                   | Resurfacing | 66 (14.4%)    | 3.03 (0.77-11.58)         | 14.00 (7.54-25.20)  | 20.85 (12.65-33.25) | 23.40 (14.43-36.63) | 23.40 (14.43-36.63) | ..                  | ..                  |
| Female (55 to 64) | Total hips  | 284 (10.5%)   | 9.94 (6.92-14.17)         | 15.50 (11.52-20.67) | 18.22 (13.70-24.01) | 23.53 (17.89-30.59) | 24.74 (18.80-32.16) | 29.76 (20.03-42.77) | 53.17 (22.79-89.19) |
|                   | Resurfacing | 89 (19.5%)    | 10.28 (5.48-18.82)        | 21.50 (14.09-32.01) | 24.39 (16.41-35.33) | 28.65 (19.57-40.74) | 33.41 (21.99-48.61) | ..                  | ..                  |
| Female (65 to 74) | Total hips  | 560 (20.6%)   | 10.71 (8.36-13.66)        | 19.47 (16.18-23.34) | 22.55 (18.88-26.82) | 23.64 (19.76-28.15) | 23.64 (19.76-28.15) | 23.64 (19.76-28.15) | 23.64 (19.76-28.15) |
|                   | Resurfacing | 64 (14.0%)    | 4.95 (1.62-14.57)         | 8.76 (3.73-19.85)   | 11.91 (5.34-25.38)  | 11.91 (5.34-25.38)  | 11.91 (5.34-25.38)  | ..                  | ..                  |
| Female (≥75)      | Total hips  | 536 (19.8%)   | 7.35 (5.37-10.01)         | 11.70 (8.97-15.18)  | 14.61 (11.34-18.72) | 15.80 (12.00-20.64) | 15.80 (12.00-20.64) | 15.80 (12.00-20.64) | ..                  |
|                   | Resurfacing | 8 (1.8%)      | 0                         | 0                   | 0                   | 0                   | ..                  | ..                  | ..                  |
| Males             | Total hips  | 1,215 (44.8%) | 9.24 (7.70-11.07)         | 15.42 (13.33-17.80) | 20.49 (17.88-23.42) | 23.41 (20.32-26.88) | 30.62 (25.31-36.75) | 30.62 (25.31-36.75) | 30.62 (25.31-36.75) |
|                   | Resurfacing | 230 (50.3%)   | 7.57 (4.77-11.90)         | 12.84 (8.97-18.22)  | 15.43 (11.05-21.33) | 19.43 (14.05-26.53) | 19.43 (14.05-26.53) | 32.86 (14.70-63.15) | 32.86 (14.70-63.15) |
| Male (<55)        | Total hips  | 116 (4.3%)    | 6.40 (3.10-12.97)         | 14.24 (8.63-22.99)  | 18.80 (11.95-28.88) | 20.61 (13.26-31.23) | 24.79 (15.29-38.68) | ..                  | ..                  |
|                   | Resurfacing | 62 (13.6%)    | 4.87 (1.60-14.33)         | 13.38 (6.92-25.01)  | 15.31 (8.25-27.41)  | 18.13 (10.02-31.54) | 18.13 (10.02-31.54) | 38.60 (13.80-79.85) | 38.60 (13.80-79.85) |
| Male (55 to 64)   | Total hips  | 250 (9.2%)    | 9.64 (6.51-14.16)         | 17.89 (13.42-23.64) | 24.02 (18.56-30.77) | 26.62 (20.45-34.22) | 35.56 (25.58-47.98) | 35.56 (25.58-47.98) | 35.56 (25.58-47.98) |
|                   | Resurfacing | 85 (18.6%)    | 7.19 (3.30-15.32)         | 9.95 (5.09-18.96)   | 13.20 (7.26-23.33)  | 20.25 (11.90-33.25) | 20.25 (11.90-33.25) | ..                  | ..                  |
| Male (65 to 74)   | Total hips  | 439 (16.2%)   | 10.68 (8.08-14.06)        | 17.16 (13.69-21.39) | 22.11 (17.82-27.25) | 26.01 (20.90-32.10) | 34.89 (26.11-45.59) | 34.89 (26.11-45.59) | ..                  |
|                   | Resurfacing | 63 (13.8%)    | 13.14 (6.79-24.59)        | 17.49 (9.72-30.34)  | 17.49 (9.72-30.34)  | 17.49 (9.72-30.34)  | 17.49 (9.72-30.34)  | ..                  | ..                  |
| Male (≥75)        | Total hips  | 410 (15.1%)   | 8.14 (5.78-11.38)         | 12.00 (8.89-16.09)  | 16.34 (12.26-21.60) | 18.54 (13.19-25.72) | 18.54 (13.19-25.72) | ..                  | ..                  |
|                   | Resurfacing | 20 (4.4%)     | 0                         | 7.69 (1.12-43.36)   | 23.08 (5.75-68.75)  | 23.08 (5.75-68.75)  | ..                  | ..                  | ..                  |

Note: Blue italics represent estimates where the number at risk has fallen below 250 cases. Blank cell indicates that the number at risk has fallen below 10, thus estimates have been removed as they would be highly unreliable.

**Supplemental table 2: Number and percentage of revision episodes by indication for revision, in the total hip population**

| <b>Indication for revision</b>         | <b>1st revisions (N=25082)<br/>N (%)</b> | <b>2nd revisions (N=2712)<br/>N (%)</b> | <b>3rd revisions (N=453)<br/>N (%)</b> |
|----------------------------------------|------------------------------------------|-----------------------------------------|----------------------------------------|
| Aseptic loosening                      | 6306 (25.1)                              | 559 (20.6)                              | 81 (17.9)                              |
| Dislocation / Subluxation              | 4753 (18.9)                              | 706 (26.0)                              | 111 (24.5)                             |
| Infection                              | 4055 (16.2)                              | 900 (33.2)                              | 204 (45.0)                             |
| Periprosthetic fracture                | 3739 (14.9)                              | 228 (8.4)                               | 37 (8.2)                               |
| Adverse reaction to particulate debris | 3323 (13.2)                              | 146 (5.4)                               | 14 (3.1)                               |
| Pain                                   | 2935 (11.7)                              | 231 (8.5)                               | 33 (7.3)                               |
| Other indication                       | 1886 (7.5)                               | 172 (6.3)                               | 30 (6.6)                               |
| Malalignment                           | 1781 (7.1)                               | 136 (5.0)                               | 12 (2.6)                               |
| Implant wear                           | 1535 (6.1)                               | 125 (4.6)                               | 20 (4.4)                               |
| Lysis                                  | 1383 (5.5)                               | 87 (3.2)                                | 20 (4.4)                               |
| Implant fracture                       | 789 (3.1)                                | 76 (2.8)                                | 12 (2.6)                               |
| Head-socket size mismatch              | 176 (0.7)                                | 10 (0.4)                                | 2 (0.4)                                |

NB: Please note that, as several indications for revision can be stated, the indications are not mutually exclusive and therefore column percentages may not add up to 100%.

**Supplemental table 3: Number and percentage of revision episodes by indication for revision, in the resurfacing hip population**

| <b>Indication for revision</b>         | <b>1st revisions (N=3928)<br/>N (%)</b> | <b>2nd revisions (N=457)<br/>N (%)</b> | <b>3rd revisions (N=79)<br/>N (%)</b> |
|----------------------------------------|-----------------------------------------|----------------------------------------|---------------------------------------|
| Adverse reaction to particulate debris | 1421 (36.2)                             | 110 (24.1)                             | 5 (6.3)                               |
| Pain                                   | 1149 (29.3)                             | 100 (21.9)                             | 10 (12.7)                             |
| Aseptic loosening                      | 812 (20.7)                              | 111 (24.3)                             | 17 (21.5)                             |
| Other indication                       | 614 (15.6)                              | 50 (10.9)                              | 1 (1.3)                               |
| Periprosthetic fracture                | 410 (10.4)                              | 27 (5.9)                               | 4 (5.1)                               |
| Lysis                                  | 329 (8.4)                               | 33 (7.2)                               | 4 (5.1)                               |
| Malalignment                           | 221 (5.6)                               | 24 (5.3)                               | 3 (3.8)                               |
| Infection                              | 181 (4.6)                               | 70 (15.3)                              | 29 (36.7)                             |
| Implant wear                           | 100 (2.5)                               | 19 (4.2)                               | 6 (7.6)                               |
| Dislocation / Subluxation              | 95 (2.4)                                | 63 (13.8)                              | 18 (22.8)                             |
| Implant fracture                       | 90 (2.3)                                | 9 (2.0)                                | 2 (2.5)                               |
| Head-socket size mismatch              | 25 (0.6)                                | 3 (0.7)                                | 1 (1.3)                               |

NB: Please note that, as several indications for revision can be stated, the indications are not mutually exclusive and therefore column percentages may not add up to 100%.

Supplemental figure 1: Revision schematic describing patient pathway

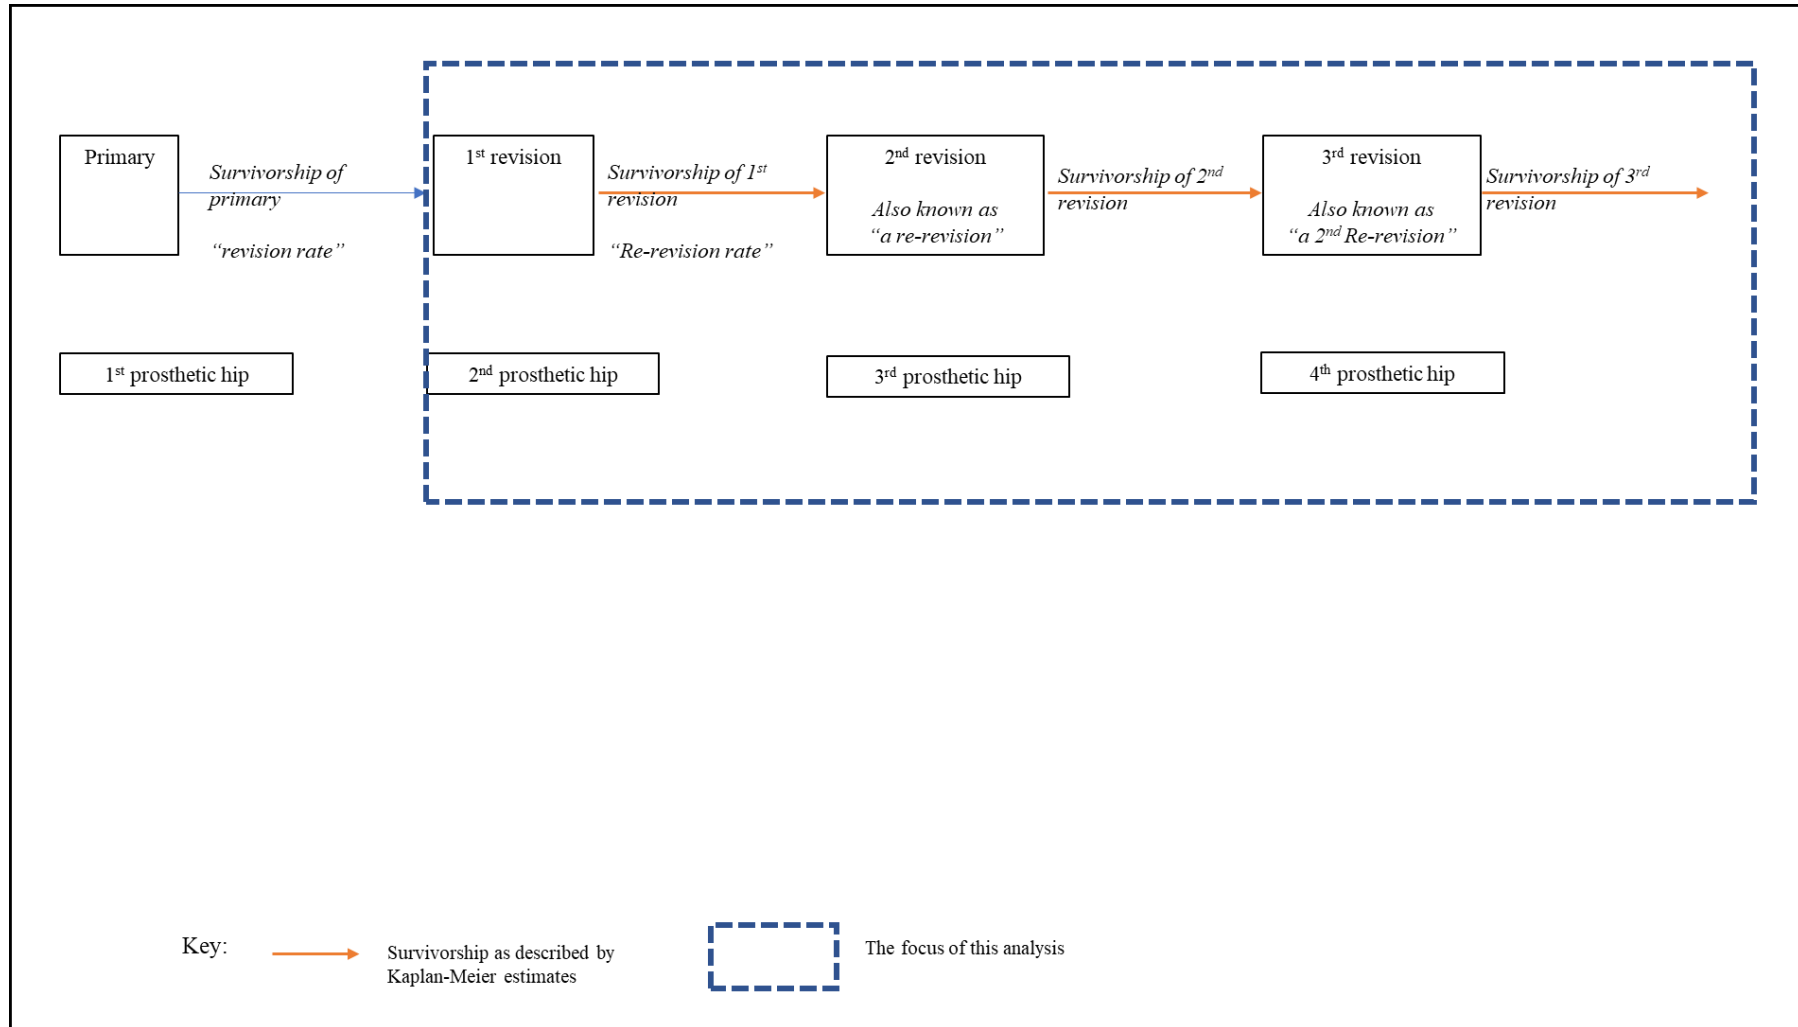

Supplement: mmc1.pdf [file mmc1.pdf]
